# Supplementary material
Source: PubMed Central journal article supplement (PMC3876809)
Supplement: supp_113.050930_DMD050930SupplementalFINAL.pdf [file supp_113.050930_DMD050930SupplementalFINAL.pdf]

DMD050930  
Supplemental Files  
Drug Metabolism and Disposition

**Down-regulation of sulfotransferase expression and activity  
in diseased human livers**

Emine B. Yalcin, Vijay More, Karissa Neira, Zhenqiang James Lu,  
Nathan J. Cherrington, Angela L. Slitt, and Roberta S. King

Contents:

Supplemental Data, Figure 1.

Supplemental Data, Figure 2.

Supplemental Data, Figure 3.

Supplemental Data, Table 1.

Supplemental Data, Table 2.

Supplemental Data, Figure 1

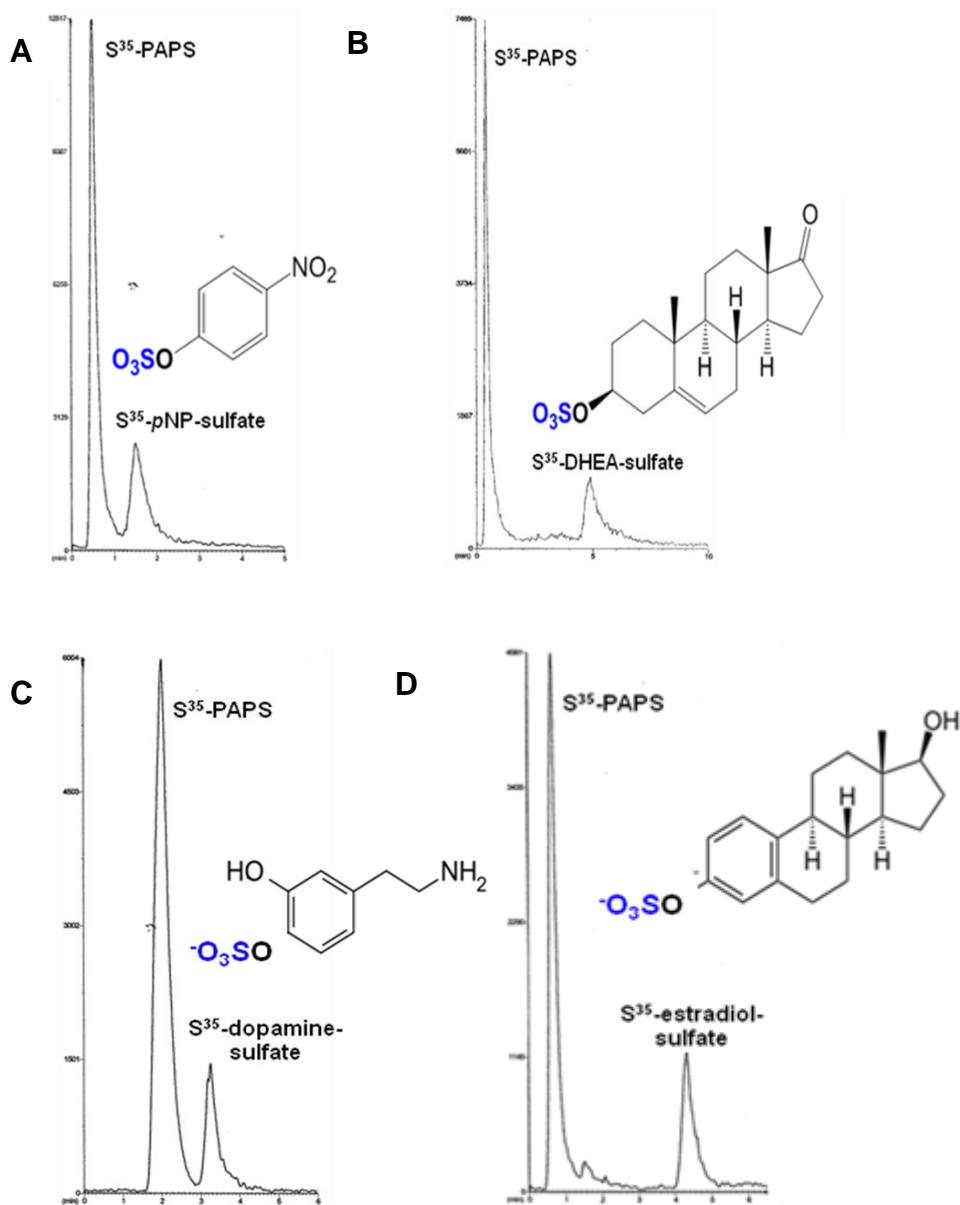

Supplemental Data, Figure 1. HPLC separation and radio detection of S-35 labeled metabolites (A)  $^{35}S$ -pNP-sulfate, (B)  $^{35}S$ -DHEA-sulfate, (C)  $^{35}S$ -dopamine-sulfate, and (D)  $^{35}S$ -estradiol-sulfate.

## Supplemental Data, Figure 2

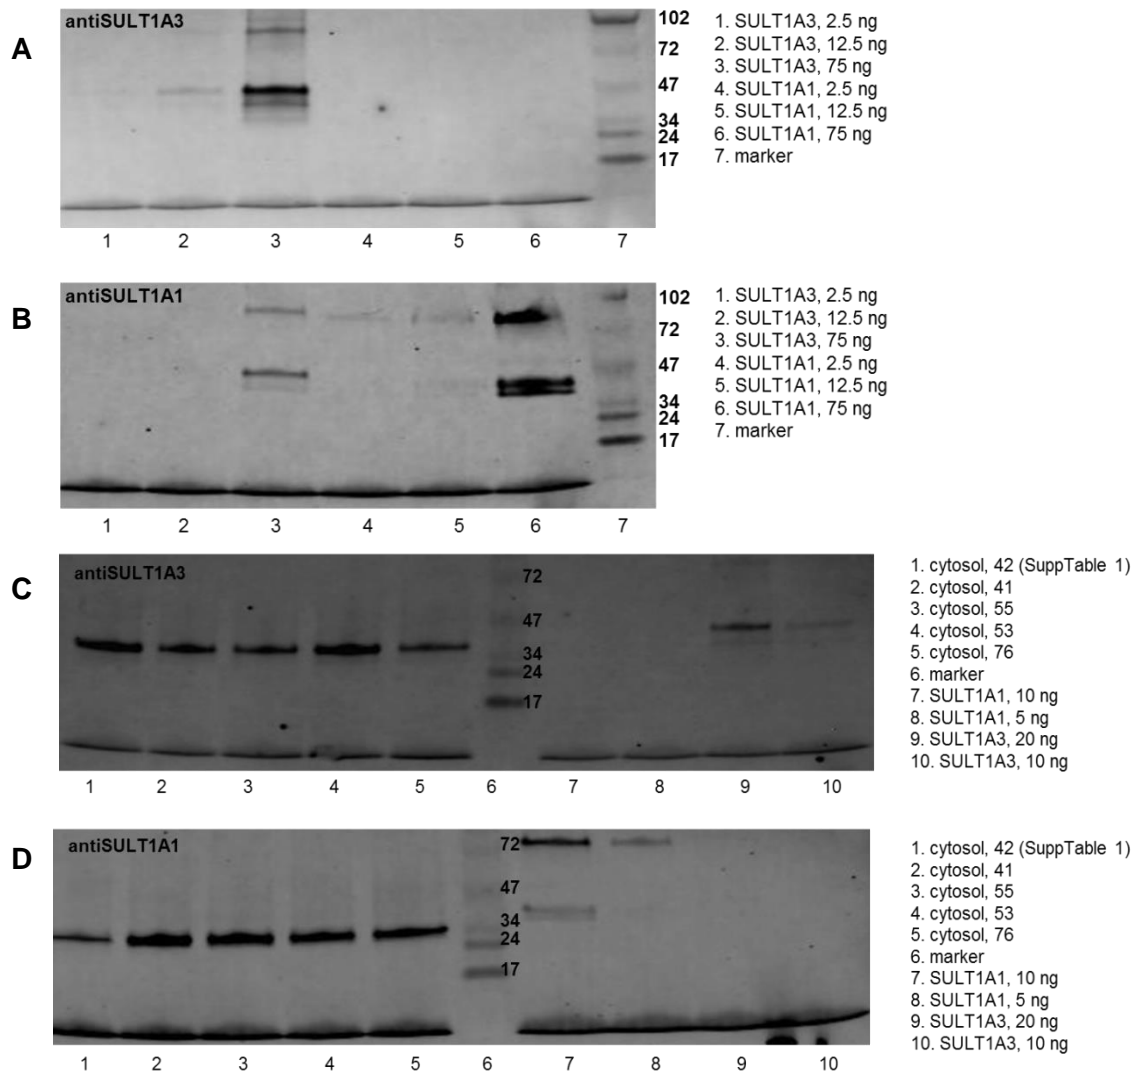

**Supplemental Data, Figure 2. The specificities of SULT1A1 and SULT1A3 antibodies.** The specificity of SULT1A1 antibody (Aviva Systems Biology) and SULT1A3 antibody (Abcam) against recombinant human SULT1A1 and SULT1A3 (Origene) and human liver cytosol protein were determined by Western blot using the same conditions (antibody source, dilution, and probing time) as for the original data. **(A)** Anti-SULT1A3 antibody recognized the monomer and dimer form of recombinant SULT1A3 (lanes 2,3) and did not cross-react with recombinant SULT1A1 even at very high loading (75 ng, lane 6). **(B)** Anti-SULT1A1 antibody recognized the monomer and dimer form of SULT1A1 recombinant protein (lanes 4,5,6), and also faintly detected a high loading amount of recombinant SULT1A3 (75 ng, lane 3). However, this limited amount of cross-reactivity would affect our results ONLY if SULT1A3 were present in the human liver cytosols at substantially higher concentrations than SULT1A1 (compare band intensity of lane 3 to lane 6, equal loading). **(C and D)** A subset of five of the 76 human liver samples were run next to recombinant SULT1A1 and recombinant SULT1A3, and were detected with anti-SULT1A3 **(C)** and anti-SULT1A1 **(D)**. A single band at the expected molecular weight was detected for each liver sample on the blot, and the band intensity of individual samples was relative to previous blots. The recombinant proteins provided from Origene contain C-terminal MYC/DDK tag, thus their molecular weight is slightly higher than the native protein in human liver cytosol.

Supplemental Data, Figure 3

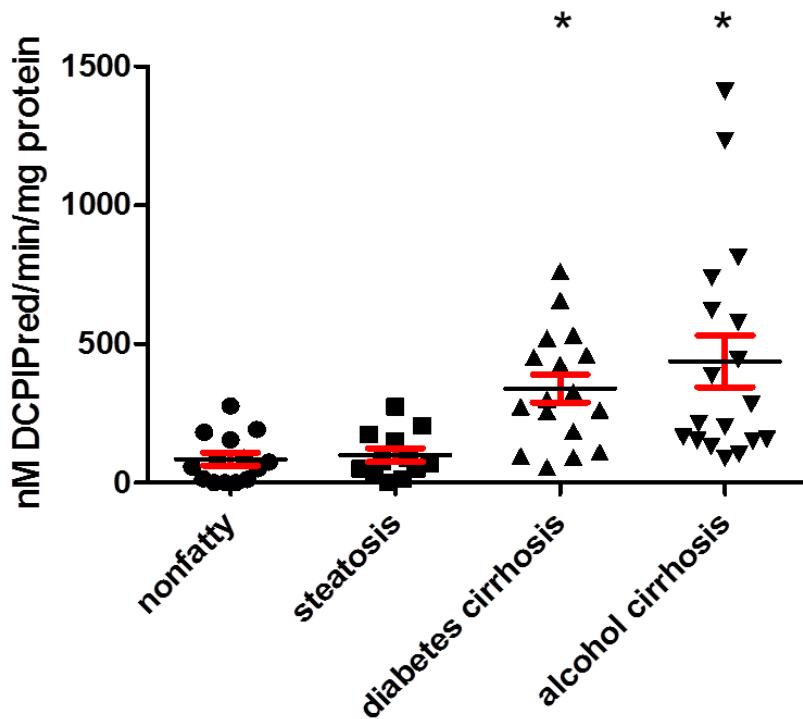

\* differences between non-fatty and diseased livers ( $p < 0.05$ )

**Supplemental Data, Figure 3. NAD(P)H:quinone oxidoreductase 1 (NQO1) activity assay in non-fatty (control) and diseased human liver.** NQO1 activity was determined by measuring colorimetric reduction of Dichlorophenolindophenol (DCPIP) at 600 nm for an interval of 3 min. The reaction was performed in triplicate in 96 well plate containing 200  $\mu$ M NAD(P)H, 40  $\mu$ M DCPIP, and liver cytosol. Inhibition reactions were performed with the addition of 20  $\mu$ M of dicumarol to the reaction mixture. The activity was determined by the difference in absorbance rates of the uninhibited and inhibited reaction rates, normalized to total cytosolic protein content, and expressed as nmole DCPIP reduced/min/mg protein.  $P < 0.05$  was considered statistically significant.

**Supplemental Data, Table 1. Human Liver Donor Information**

| <b>Sample ID</b> | <b>LTCDS code</b> | <b>DIAGNOSIS</b> | <b>GENDER</b> | <b>ETHNICITY</b> | <b>AGE</b> | <b>SGOT</b> | <b>AP</b> |
|------------------|-------------------|------------------|---------------|------------------|------------|-------------|-----------|
| 1                | HH1038            | NON-FATTY        | M             | CAUCASIAN        | 47         | 227         | NA        |
| 2                | HH991-4740        | NON-FATTY        | M             | HISPANIC         | 47         | 125         | NA        |
| 3                | HH995-5640        | NON-FATTY        | M             | CAUCASIAN        | 56         | 22          | NA        |
| 4                | HH1014-5640       | NON-FATTY        | M             | CAUCASIAN        | 56         | 36          | NA        |
| 5                | HH997-4340        | NON-FATTY        | M             | BLACK            | 43         | 26          | NA        |
| 39               | D386              | NON-FATTY        | M             | NA               | 45         | NA          | NA        |
| 40               | D587              | NON-FATTY        | M             | NA               | 49         | NA          | NA        |
| 41               | HH987-5740        | NON-FATTY        | M             | CAUCASIAN        | 57         | 54          | NA        |
| 42               | HH996-5540        | NON-FATTY        | M             | CAUCASIAN        | 55         | 47          | NA        |
| 43               | HH969-4640        | NON-FATTY        | M             | CAUCASIAN        | 46         | 13          | NA        |
| 6                | HH985-5740        | NON-FATTY        | F             | BLACK            | 57         | 257         | NA        |
| 7                | HH978-4140        | NON-FATTY        | F             | CAUCASIAN        | 41         | 0           | NA        |
| 8                | HH968-5940        | NON-FATTY        | F             | CAUCASIAN        | 59         | 13          | NA        |
| 9                | HH979-5440        | NON-FATTY        | F             | ASIAN            | 54         | 0           | NA        |
| 10               | HH1013-5340       | NON-FATTY        | F             | CAUCASIAN        | 53         | 58          | NA        |
| 44               | HH999-5740        | NON-FATTY        | F             | CAUCASIAN        | 57         | 104         | NA        |
| 45               | HH1009-4940       | NON-FATTY        | F             | HISPANIC         | 49         | 92          | NA        |
| 46               | HH989-5440        | NON-FATTY        | F             | CAUCASIAN        | 54         | 38          | NA        |
| 47               | HH976-5040        | NON-FATTY        | F             | CAUCASIAN        | 50         | 63          | NA        |
| 48               | HH982-5040        | NON-FATTY        | F             | CAUCASIAN        | 50         | 60          | NA        |
| 16               | 918               | DIABETES         | F             | NA               | 55         | 528         | 154       |
| 17               | 935               | DIABETES         | F             | 0-WHITE          | 60         | 30          | 170       |
| 18               | 1202              | DIABETES         | F             | 2-ASIAN          | 42         | 405         | 115       |
| 19               | 1073              | DIABETES         | M             | 0-WHITE          | 57         | 35          | 124       |

|    |        |                       |   |               |    |      |          |
|----|--------|-----------------------|---|---------------|----|------|----------|
| 11 | HH883  | STEATOSIS             | M | CAUCASIA<br>N | 46 | 19   | NA       |
| 12 | HH870  | STEATOSIS             | M | CAUCASIA<br>N | 37 | 75   | NA       |
| 13 | HH930  | STEATOSIS             | M | CAUCASIA<br>N | 31 | 93   | NA       |
| 14 | HH1124 | STEATOSIS             | M | CAUCASIA<br>N | 40 | 230  | NA       |
| 15 | HH1020 | STEATOSIS             | M | CAUCASIA<br>N | 45 | 146  | NA       |
| 49 | HH969  | STEATOSIS             | M | CAUCASIA<br>N | 46 | 13   | NA       |
| 50 | HH894  | STEATOSIS             | M | CAUCASIA<br>N | 40 | 34   | NA       |
| 51 | HH1125 | STEATOSIS             | F | NA            | 49 | 59   | NA       |
| 52 | HH978  | STEATOSIS             | F | NA            | 41 | 0    | NA       |
| 53 | HH993  | STEATOSIS             | F | NA            | 46 | 52   | NA       |
| 54 | HH967  | STEATOSIS             | F | CAUCASIA<br>N | 48 | 80   | NA       |
| 55 | HH977  | STEATOSIS             | F | CAUCASIA<br>N | 38 | 23   | NA       |
| 56 | HH990  | STEATOSIS             | F | NA            | 37 | 239  | NA       |
| 77 | HH1085 | STEATOSIS             | M | CAUCASIA<br>N | 46 | 186  | NA       |
| 20 | 1018   | DIABETES<br>CIRRHOSIS | M | NA            | 56 | 3930 | 226      |
| 21 | 1146   | DIABETES<br>CIRRHOSIS | M | 0-WHITE       | 65 | 68   | 118      |
| 22 | 1101   | DIABETES<br>CIRRHOSIS | M | 0-WHITE       | 36 | 144  | 222      |
| 23 | 1019   | DIABETES<br>CIRRHOSIS | M | 0-WHITE       | 52 | 30   | 173      |
| 24 | 1003   | DIABETES<br>CIRRHOSIS | M | 0-WHITE       | 62 | 71   | 79       |
| 25 | 989    | DIABETES<br>CIRRHOSIS | F | NA            |    | 34   | 180      |
| 26 | 992    | DIABETES<br>CIRRHOSIS | F | 2-ASIAN       | 62 | 91   | 116<br>8 |
| 27 | 1054   | DIABETES<br>CIRRHOSIS | F | 0-WHITE       | 62 | 43   | 224      |
| 28 | 1006   | DIABETES<br>CIRRHOSIS | F | 0-WHITE       | 58 |      | 69       |
| 29 | 970    | DIABETES<br>CIRRHOSIS | F | 0-WHITE       | 62 | 25   | 88       |
| 57 | 1288   | DIABETES              | M | 0-WHITE       | 54 | 97   | 142      |

|    |      |                                                     |   |         |    |      |          |
|----|------|-----------------------------------------------------|---|---------|----|------|----------|
|    |      | CIRRHOSIS                                           |   |         |    |      |          |
| 58 | 1138 | DIABETES,<br>CIRRHOSIS<br>CRYPTOGENI<br>C           | M | NA      |    | 52   | 105      |
| 59 | 1015 | DIABETES<br>CIRRHOSIS                               | M | 0-WHITE | 39 | 1720 | 178      |
| 60 | 1141 | DIABETES<br>TYPE-1,<br>CIRRHOSIS<br>CRYPTOGENI<br>C | M | 0-WHITE | 51 | 31   | 96       |
| 61 | 1278 | DIABETES<br>CIRRHOSIS                               | M | 0-WHITE | 49 | 57   | 189      |
| 62 | 1232 | DIABETES<br>CIRRHOSIS                               | M | 0-WHITE | 50 | 200  | 259      |
| 63 | 1107 | DIABETES,<br>CIRRHOSIS<br>CRYPTOGENI<br>C           | M | 0-WHITE | 72 | 36   | 216      |
| 64 | 1144 | DIABETES,<br>CIRRHOSIS<br>CRYPTOGENI<br>C           | M | 1-BLACK | 33 | 43   | 330      |
| 65 | 1090 | DIABETES<br>TYPE-1,<br>CIRRHOSIS                    | M | 2-ASIAN | 39 | 283  | 229      |
| 66 | 1188 | DIABETES,<br>CIRRHOSIS<br>CRYPTOGENI<br>C           | M | NA      | 66 | 52   | 415      |
| 67 | 1198 | DIABETES<br>TYPE-1,<br>CIRRHOSIS                    | F | 0-WHITE | 43 | 62   | 176<br>3 |
| 68 | 1172 | DIABETES<br>CIRRHOSIS<br>PRIMARY<br>BILIARY         | F | 0-WHITE | 53 | 36   | 163      |
| 30 | 769  | ALCOHOL<br>CIRRHOSIS                                | F | 0-WHITE | 36 | 41   | NA       |
| 31 | 788  | ALCOHOL<br>CIRRHOSIS                                | M | 0-WHITE | 55 | 29   | 82       |
| 32 | 1079 | ALCOHOL<br>CIRRHOSIS                                | M | 0-WHITE | 63 | 102  | 258      |
| 33 | 1232 | ALCOHOL<br>CIRRHOSIS                                | M | 0-WHITE | 50 | 200  | 259      |

|    |      |                      |   |         |    |      |     |
|----|------|----------------------|---|---------|----|------|-----|
| 34 | 1177 | ALCOHOL<br>CIRRHOSIS | M | 0-WHITE | 57 | 36   | 184 |
| 35 | 815  | ALCOHOL<br>CIRRHOSIS | F | 0-WHITE | 44 | 240  | 145 |
| 36 | 869  | ALCOHOL<br>CIRRHOSIS | F | 0-WHITE | 47 | 553  | 285 |
| 37 | 1108 | ALCOHOL<br>CIRRHOSIS | F | NA      | 48 | 36   | 116 |
| 38 | 1126 | ALCOHOL<br>CIRRHOSIS | F | 0-WHITE | 47 | 50   | 140 |
| 69 | 1265 | ALCOHOL<br>CIRRHOSIS | M | 0-WHITE | 47 | 80   | 191 |
| 70 | 994  | ALCOHOL<br>CIRRHOSIS | M | NA      | 33 | 501  | 51  |
| 71 | 1048 | ALCOHOL<br>CIRRHOSIS | M | NA      | 42 | 28   | 305 |
| 72 | 1075 | ALCOHOL<br>CIRRHOSIS | M | 0-WHITE | 56 | 77   | 121 |
| 73 | 1251 | ALCOHOL<br>CIRRHOSIS | M | 0-WHITE | 48 | 54   | 261 |
| 74 | 1106 | ALCOHOL<br>CIRRHOSIS | M | 0-WHITE | 54 | 48   | 147 |
| 75 | 661  | ALCOHOL<br>CIRRHOSIS | F | NA      | 52 | 43   | 165 |
| 76 | 961  | ALCOHOL<br>CIRRHOSIS | F | NA      | 51 | 27   | 97  |
| 78 | 931  | ALCOHOL<br>CIRRHOSIS | F | NA      | 33 | 681  | 56  |
| 79 | 1125 | ALCOHOL<br>CIRRHOSIS | M | 0-WHITE | 48 | 37   | 174 |
| 80 | 1244 | ALCOHOL<br>CIRRHOSIS | M | 0-WHITE | 52 | 1425 | 114 |
| 81 | 1217 | ALCOHOL<br>CIRRHOSIS | M | 0-WHITE | 44 | 115  | 122 |
| 82 | 965  | ALCOHOL<br>CIRRHOSIS | M | NA      | 46 | 47   | 159 |
| 83 | 1280 | ALCOHOL<br>CIRRHOSIS | M | 0-WHITE | 55 | 52   | 178 |
| 84 | 1286 | ALCOHOL<br>CIRRHOSIS | M | 0-WHITE | 59 | 32   | 91  |



**Supplemental Data, Table 2.** Summary of western blot conditions for detection and quantification of sulfotransferase isoforms.

|                                  | <b>SULT1A1</b>                                                                                         | <b>SULT2A1</b>                                                                         | <b>SULT1E1</b>                                                                                          | <b>SULT1A3</b>                                                                          |
|----------------------------------|--------------------------------------------------------------------------------------------------------|----------------------------------------------------------------------------------------|---------------------------------------------------------------------------------------------------------|-----------------------------------------------------------------------------------------|
| <b>Immunogen for 1° Antibody</b> | ELIQDTSRP<br>PLEYVKGVP<br>LIKYFAEALG<br>PLQSFQARP<br>DILLISTYPK<br>SGT<br><br>Aviva System<br>Biology® | KLH<br>conjugated<br>synthetic<br>peptide<br>selected from<br>C-terminal<br><br>Abcam® | LMVAGHPN<br>PGSFPEFVE<br>KFMQGQVP<br>YGSWYKHV<br>KSWWEK GK<br>SPRVLFLFY<br><br>Aviva System<br>Biology® | Synthetic<br>peptide<br>corresponds<br>to residues in<br>human<br>SULT1A3<br><br>Abcam® |
| <b>host</b>                      | rabbit                                                                                                 | rabbit                                                                                 | rabbit                                                                                                  | rabbit                                                                                  |
| <b>purification</b>              | affinity<br>purified                                                                                   | protein G<br>purified                                                                  | affinity<br>purified                                                                                    | tissue culture<br>supernatant                                                           |
| <b>concentration</b>             | 250 ng/ml                                                                                              | 25 ng/ml                                                                               | 1000 ng/ml                                                                                              | 10 µl in 10 ml<br>TBST                                                                  |
| <b>incubation<br/>time</b>       | overnight                                                                                              | 1 hour                                                                                 | overnight                                                                                               | overnight                                                                               |
| <b>2° Antibody<br/>dilution</b>  | 1:10,000                                                                                               | 1:10,000                                                                               | 1:10,000                                                                                                | 1:10,000                                                                                |
